# Supplementary material for: Proviral NUP153 binding to viral proteins and RNA regulates structural–nonstructural protein ratios in orthoflavivirus infection
Source: Nat Commun. 2026 Apr 8;17:3402. doi: 10.1038/s41467-026-71449-1 (PMC13068965; doi:10.1038/s41467-026-71449-1)
Supplement: Supplementary file 3 — Supplemental Data 1 [file 41467_2026_71449_MOESM3_ESM.xlsx]

## Sheet: Only MOCK
Protein names	Gene names	LFQ intensity 153_MOCK_1	LFQ intensity 153_MOCK_2	LFQ intensity 153_MOCK_3	LFQ intensity 153_TBEV_1	LFQ intensity 153_TBEV_2	LFQ intensity 153_TBEV_3	G4 binding
Caprin-1	CAPRIN1	2884300	3629000	3195500	0	0	0	+
Cleavage and polyadenylation specificity factor subunit 7	CPSF7	0	1339300	1333200	0	0	0
Spliceosome RNA helicase DDX39B;ATP-dependent RNA helicase DDX39A	DDX39B;DDX39A	1781600	1422200	0	0	0	0
Eukaryotic translation elongation factor 1 epsilon-1	EEF1E1	10696000	9525200	0	0	0	0	+
Eukaryotic translation initiation factor 3 subunit H	EIF3H	4227200	5136900	0	0	0	0
Exosome complex component RRP4	EXOSC2	6625000	8046200	7581600	0	0	0
Exosome complex component RRP46	EXOSC5	3546600	0	2885800	0	0	0
Protein FRG1	FRG1	5313600	6036500	0	0	0	0
Trifunctional enzyme subunit alpha, mitochondrial;Long-chain enoyl-CoA hydratase;Long chain 3-hydroxyacyl-CoA dehydrogenase	HADHA	2314000	2547800	2075400	0	0	0	+
Inosine-5-monophosphate dehydrogenase 2	IMPDH2	1462600	1747100	0	0	0	0	+
Microfibrillar-associated protein 1	MFAP1	0	3999900	3192800	0	0	0
Multiple myeloma tumor-associated protein 2	MMTAG2	701020	1385400	0	0	0	0
39S ribosomal protein L12, mitochondrial	MRPL12	14047000	14764000	15030000	0	0	0
39S ribosomal protein L16, mitochondrial	MRPL16	4660700	5060900	3999000	0	0	0
28S ribosomal protein S2, mitochondrial	MRPS2	2953100	3468200	0	0	0	0	+
28S ribosomal protein S33, mitochondrial	MRPS33	7188400	8569600	0	0	0	0
DNA-directed RNA polymerases I, II, and III subunit RPABC5	POLR2L	2415100	1667400	0	0	0	0
Peptidyl-prolyl cis-trans isomerase-like 1	PPIL1	7623900	0	6223800	0	0	0
GTP-binding nuclear protein Ran	RAN	4205700	5184700	5880400	0	0	0	+
RNA-binding protein 4B;RNA-binding protein 4	RBM4B;RBM4	1478000	0	1321000	0	0	0	+
Protein SEC13 homolog	SEC13	8149500	7212800	0	0	0	0
Signal recognition particle subunit SRP72	SRP72	5760800	5903600	5015600	0	0	0	+
U4/U6.U5 tri-snRNP-associated protein 2	USP39	1721600	1558700	1481800	0	0	0
U3 small nucleolar RNA-associated protein 18 homolog	UTP18	1582000	2097300	0	0	0	0	+
Zinc finger CCCH domain-containing protein 14	ZC3H14	1839000	1696400	2116600	0	0	0	+
Zinc finger Ran-binding domain-containing protein 2	ZRANB2	8234900	8188400	9169300	0	0	0

## Sheet: Only TBEV
Protein names	Gene names	LFQ intensity 153_MOCK_1	LFQ intensity 153_MOCK_2	LFQ intensity 153_MOCK_3	LFQ intensity 153_TBEV_1	LFQ intensity 153_TBEV_2	LFQ intensity 153_TBEV_3	G4 binding
Actin-like protein 6A	ACTL6A	0	0	0	3753400	3208900	2848400	+
Actin-related protein 2/3 complex subunit 3	ARPC3	0	0	0	5772500	6729600	6765200
Coiled-coil domain-containing protein 137	CCDC137	0	0	0	2952600	3444300	2336500
Lysosomal protective protein;Lysosomal protective protein 32 kDa chain;Lysosomal protective protein 20 kDa chain	CTSA	0	0	0	0	3165800	3645500
Gelsolin	GSN	0	0	0	2485000	3152300	3938500
Myc-associated zinc finger protein	MAZ	0	0	0	7357200	0	6635200
Nascent polypeptide-associated complex subunit alpha, muscle-specific form;Nascent polypeptide-associated complex subunit alpha;Putative nascent polypeptide-associated complex subunit alpha-like protein	NACA;NACAP1	0	0	0	4788000	0	3768000
Ribosome production factor 2 homolog	RPF2	0	0	0	4034900	4438000	0	+

## Sheet: MOCK&TBEV
Protein names	Gene names	LFQ intensity 153_TBEV_1 (log2)	LFQ intensity 153_TBEV_2 (log2)	LFQ intensity 153_TBEV_3 (log2)	LFQ intensity 153_MOCK_1 (log2)	LFQ intensity 153_MOCK_2 (log2)	LFQ intensity 153_MOCK_3 (log2)	Student's T-test Significant 153T_153M	Student's T-test Difference 153T_153M	G4 binding
THO complex subunit 4	ALYREF	28.0873	28.1518	28.0412	28.2145	27.9864	27.971		0.0361589
AP-2 complex subunit beta	AP2B1	22.001	22.4812	23.468	23.3875	23.5163	23.0819		-0.678484
ATP synthase subunit d, mitochondrial	ATP5H	22.4555	23.0144	22.2602	22.695	22.3748	22.7666		-0.035436
ATP synthase-coupling factor 6, mitochondrial	ATP5J	20.7662	23.6157	20.2399	23.642	23.4526	23.3178		-1.93018
ATP synthase subunit O, mitochondrial	ATP5O	23.3647	23.7604	23.4329	23.6626	23.7946	23.5256		-0.141651
Ataxin-2-like protein	ATXN2L	22.4929	22.8459	22.6779	23.6829	23.5024	23.6883	+	-0.952284	+
Bcl-2-associated transcription factor 1	BCLAF1	22.2928	22.5259	22.2675	22.5706	22.5752	22.5606		-0.206715
Bystin	BYSL	21.1908	20.9506	21.1003	20.7346	19.3185	21.237		0.650535
Uncharacterized protein C11orf98	C11orf98	24.1876	24.1509	23.8877	24.148	24.5845	24.578		-0.361431
UPF0568 protein C14orf166	C14orf166	25.7577	25.389	25.6603	26.2329	26.0203	26.0898	+	-0.511993
Uncharacterized protein C7orf50	C7orf50	21.035	23.9871	23.6359	23.5136	23.3611	23.3195		-0.512056
UPF0488 protein C8orf33	C8orf33	22.9365	23.1911	19.639	23.1395	22.7824	22.8352		-0.996808
Protein CASC3	CASC3	21.3361	21.2702	20.9795	21.5402	21.6154	21.7564		-0.442062
Coiled-coil domain-containing protein 137	CCDC137	21.4936	21.7158	21.1559	21.7392	20.5059	21.564		0.185381
Chromatin target of PRMT1 protein	CHTOP	25.9646	26.0202	25.8476	25.8703	25.9666	26.0243		-0.00958379	+
Cold-inducible RNA-binding protein	CIRBP	23.7025	23.9308	23.6888	24.5569	24.6896	24.1937	+	-0.706029
Clathrin light chain A	CLTA	23.4401	23.1699	23.1566	25.0399	24.4089	24.3478	+	-1.34333
Clathrin light chain B	CLTB	22.3377	21.9433	22.2895	24.0392	23.3644	23.2185	+	-1.35051
Coatomer subunit epsilon	COPE	24.9354	24.7943	24.9044	24.5598	24.3049	23.0476		0.907295	+
Protein CYR61	CYR61	23.1335	23.1043	22.8775	23.0427	22.8778	22.8021		0.130922
28S ribosomal protein S29, mitochondrial	DAP3	21.3385	19.7208	22.4656	23.2886	23.1087	22.9035	+	-1.92527	+
DDB1- and CUL4-associated factor 7	DCAF7	23.1164	22.1138	22.5973	22.1976	22.0614	22.1321		0.478774
DNA damage-binding protein 1	DDB1	22.3513	22.4714	22.2736	21.9796	22.1859	22.2923		0.21287	+
Nucleolar RNA helicase 2	DDX21	23.6025	23.5705	23.346	22.486	22.8067	23.1775	+	0.682908	+
2,4-dienoyl-CoA reductase, mitochondrial	DECR1	20.4135	22.5657	20.7585	22.6506	22.7785	22.6136		-1.43502
ATP-dependent RNA helicase A	DHX9	23.054	22.8107	22.7943	22.4767	22.3123	22.8739		0.332018	+
Probable dimethyladenosine transferase	DIMT1	22.285	22.1332	22.1732	22.3204	22.5858	22.5064		-0.273743
DnaJ homolog subfamily A member 2	DNAJA2	21.3242	21.1223	20.0624	21.0976	21.4493	20.8182		-0.285421
DnaJ homolog subfamily A member 3, mitochondrial	DNAJA3	21.8804	21.839	21.1797	22.5207	22.3799	22.1705	+	-0.723981	+
Protein dpy-30 homolog	DPY30	23.0859	22.6752	23.0571	23.8809	20.3958	22.6034		0.646051	+
Developmentally-regulated GTP-binding protein 1	DRG1	23.8451	23.4456	20.2254	23.7248	23.7803	23.6482		-1.21242
Probable rRNA-processing protein EBP2	EBNA1BP2	22.7508	22.631	22.6547	22.1275	22.011	22.1073	+	0.596899	+
Elongation factor 1-alpha 1;Putative elongation factor 1-alpha-like 3;Elongation factor 1-alpha 2	EEF1A1;EEF1A1P5;EEF1A2	24.1626	23.6502	23.931	23.924	23.9517	23.7051		0.0543385	+
Eukaryotic translation initiation factor 2 subunit 2	EIF2S2	21.8992	22.2579	21.8883	22.2086	22.4968	22.6578		-0.439215	+
Eukaryotic translation initiation factor 2 subunit 3;Putative eukaryotic translation initiation factor 2 subunit 3-like protein	EIF2S3;EIF2S3L	20.7231	20.6203	20.6176	21.004	21.1986	21.1745	+	-0.472049	+
Eukaryotic initiation factor 4A-III;Eukaryotic initiation factor 4A-III, N-terminally processed	EIF4A3	21.7317	21.5746	21.6398	22.082	21.8975	22.0473	+	-0.360222	+
Eukaryotic translation initiation factor 4E	EIF4E	22.3348	19.9428	22.4233	23.046	23.185	22.8592		-1.46313
ELAV-like protein 1	ELAVL1	23.6852	23.9402	23.6381	24.3536	24.5704	24.346	+	-0.668832	+
Ribosomal RNA small subunit methyltransferase NEP1	EMG1	20.6319	21.2434	19.6625	21.2841	21.5747	21.4704		-0.930449
Enhancer of rudimentary homolog	ERH	27.2392	27.2635	27.2667	27.3362	27.2291	27.4669		-0.0876344
RNA-binding protein EWS	EWSR1	23.279	23.2877	22.7643	23.2173	24.1484	23.3784		-0.471022	+
Exosome complex component MTR3	EXOSC6	21.5891	21.6793	21.5935	21.2183	21.4623	19.697		0.828094
Protein FAM195B	FAM195B	21.6119	21.1299	21.5713	22.2458	22.0425	22.1293	+	-0.701476
Protein FAM98A	FAM98A	22.8484	23.1026	22.8522	23.5784	23.4699	23.7374	+	-0.660811	+
40S ribosomal protein S30	FAU	28.6981	28.9652	28.3509	28.4741	28.3997	28.8304		0.103312	+
rRNA 2-O-methyltransferase fibrillarin	FBL	22.7962	22.898	23.1137	22.9676	22.65	23.0827		0.0358747	+
RNA-binding protein FUS	FUS	24.56	24.8359	24.3388	24.6263	25.2636	24.96		-0.371717	+
Ras GTPase-activating protein-binding protein 1	G3BP1	30.1794	30.2187	30.1601	30.1287	30.1125	30.1105		0.0688699	+
Ras GTPase-activating protein-binding protein 2	G3BP2	29.1013	28.9793	28.9109	28.9804	28.8666	28.9626		0.0606607	+
Glutamate-rich WD repeat-containing protein 1	GRWD1	23.7933	23.6013	23.6858	23.4488	23.2975	23.4907		0.281112
Histone H1.0;Histone H1.0, N-terminally processed	H1F0	22.6362	22.8097	22.2939	22.411	22.4486	22.8925		-0.00407982
Histone H1x	H1FX	26.2626	26.5299	26.155	26.3506	26.2385	26.2861		0.0240968
Trifunctional enzyme subunit beta, mitochondrial;3-ketoacyl-CoA thiolase	HADHB	21.7718	22.307	22.2343	22.38	22.8163	22.4628		-0.448682	+
Histone H1.5	HIST1H1B	23.3171	23.7576	23.4399	22.5041	22.6036	22.9185	+	0.829437
Histone H2B type 1-L;Histone H2B type 1-M;Histone H2B type 1-N;Histone H2B type 1-H;Histone H2B type 2-F;Histone H2B type 1-C/E/F/G/I;Histone H2B type 1-D;Histone H2B type F-S;Histone H2B type 1-K	HIST1H2BL;HIST1H2BM;HIST1H2BN;HIST1H2BH;HIST2H2BF;HIST1H2BC;HIST1H2BD;H2BFS;HIST1H2BK	28.1038	28.2049	28.0487	28.3283	28.0526	28.3789		-0.13413
Histone H4	HIST1H4A	25.1116	24.9593	25.0731	25.18	24.9577	24.968		0.0127824
Histone H2A type 2-B	HIST2H2AB	24.5881	23.7584	24.9541	26.0451	24.294	24.0583		-0.365603
Histone H2B type 3-B;Histone H2B type 2-E;Histone H2B type 1-B;Histone H2B type 1-O;Histone H2B type 1-J	HIST3H2BB;HIST2H2BE;HIST1H2BB;HIST1H2BO;HIST1H2BJ	24.8646	21.161	20.2545	25.2208	24.8036	24.8746		-2.873
High mobility group protein HMG-I/HMG-Y	HMGA1	24.0148	24.3186	24.1234	24.6219	24.5308	24.8075	+	-0.50117
Heterogeneous nuclear ribonucleoprotein A0	HNRNPA0	26.2619	25.9483	26.2085	26.3442	26.3096	26.3017		-0.178926	+
Heterogeneous nuclear ribonucleoprotein A1;Heterogeneous nuclear ribonucleoprotein A1, N-terminally processed;Heterogeneous nuclear ribonucleoprotein A1-like 2	HNRNPA1;HNRNPA1L2	28.5654	28.5207	28.5031	28.7203	28.7154	28.6751		-0.173848	+
Heterogeneous nuclear ribonucleoprotein A3	HNRNPA3	26.4001	26.2103	26.2326	26.5074	26.4259	26.3646		-0.151637	+
Heterogeneous nuclear ribonucleoprotein A/B	HNRNPAB	25.767	25.7908	25.6873	25.9328	25.8911	25.9283		-0.169058	+
Heterogeneous nuclear ribonucleoprotein D-like	HNRNPDL	22.7872	22.961	21.4681	23.2593	23.337	22.9909		-0.790293	+
Heterogeneous nuclear ribonucleoprotein K	HNRNPK	26.9015	26.7593	26.7764	27.0953	27.3109	27.203	+	-0.390684	+
Heterogeneous nuclear ribonucleoprotein L	HNRNPL	23.9759	24.0506	24.1473	24.1688	24.2075	24.2491		-0.150531	+
Heterogeneous nuclear ribonucleoprotein M	HNRNPM	21.7153	22.7488	21.8508	22.1745	22.3833	22.5908		-0.277873	+
Heterogeneous nuclear ribonucleoprotein R	HNRNPR	23.0054	22.3155	22.8289	22.6272	23.0773	22.6193		-0.0579898	+
78 kDa glucose-regulated protein	HSPA5	25.1073	24.4304	24.8363	23.3649	23.7025	23.4695	+	1.27905	+
Heat shock 70 kDa protein 6;Putative heat shock 70 kDa protein 7	HSPA6;HSPA7	26.606	26.2791	26.5528	25.7652	26.2101	26.1819		0.426896
Heat shock cognate 71 kDa protein	HSPA8	26.3478	25.9289	26.2206	26.1155	26.3966	26.2131		-0.0759411	+
Stress-70 protein, mitochondrial	HSPA9	25.9413	25.3369	25.9729	25.6025	25.9841	25.6502		0.00477918
Insulin-like growth factor 2 mRNA-binding protein 1	IGF2BP1	27.3001	27.2483	27.2507	27.6094	27.6027	27.6876	+	-0.366849	+
Insulin-like growth factor 2 mRNA-binding protein 3	IGF2BP3	22.9299	21.6108	23.1585	24.3478	23.9352	24.3579	+	-1.64724	+
Interleukin enhancer-binding factor 2	ILF2	26.0497	25.6918	26.051	26.0816	26.116	26.0345		-0.146562	+
Interleukin enhancer-binding factor 3	ILF3	24.8895	24.7531	24.9426	24.9867	25.1374	25.0136		-0.184188	+
KH domain-containing, RNA-binding, signal transduction-associated protein 1	KHDRBS1	24.082	24.2032	24.0858	24.5448	24.5179	24.4688	+	-0.386826	+
Importin subunit alpha-1	KPNA2	25.4165	25.8253	25.5837	25.706	25.9206	25.782		-0.194358	+
Importin subunit beta-1	KPNB1	25.9077	25.3481	25.8479	25.9813	25.4687	25.9573		-0.101248	+
KRR1 small subunit processome component homolog	KRR1	23.7979	23.7374	23.7858	23.1984	23.4068	23.1153	+	0.533531
LIM domain and actin-binding protein 1	LIMA1	22.9084	22.9028	23.0099	20.3242	20.0628	21.2784	+	2.38525
Protein LLP homolog	LLPH	23.9485	23.8207	24.2706	23.5158	23.7713	23.5106		0.41402
Protein LSM12 homolog	LSM12	20.226	22.9664	22.8723	23.7105	23.3673	23.4709		-1.49466
Cell growth-regulating nucleolar protein	LYAR	24.3653	24.0613	24.3685	23.6721	23.609	23.6233	+	0.630212
Protein mago nashi homolog 2	MAGOHB	21.9135	20.7945	22.4997	23.3762	22.804	22.8279		-1.26681
Mortality factor 4-like protein 2	MORF4L2	23.3776	23.5163	23.3151	23.2093	23.5588	23.3445		0.0321115	+
M-phase phosphoprotein 6	MPHOSPH6	21.1474	21.5514	21.3767	21.3495	21.3096	21.4026		0.00457128
39S ribosomal protein L11, mitochondrial	MRPL11	21.9813	20.5227	21.6942	22.1387	21.9841	22.1719		-0.698825	+
28S ribosomal protein S10, mitochondrial	MRPS10	22.4615	19.3868	22.2599	22.6065	23.0435	22.4859		-1.34256	+
28S ribosomal protein S16, mitochondrial	MRPS16	22.7858	22.7888	22.3807	23.0225	23.3996	22.9112		-0.459351
28S ribosomal protein S17, mitochondrial	MRPS17	23.5789	23.1304	23.1772	23.463	23.5175	23.2219		-0.105312	+
28S ribosomal protein S18b, mitochondrial	MRPS18B	23.278	23.1616	23.2128	23.2787	23.5018	23.1389		-0.0890274	+
28S ribosomal protein S23, mitochondrial	MRPS23	23.4565	23.3484	23.1766	23.3931	23.5342	23.5867		-0.177488	+
28S ribosomal protein S25, mitochondrial	MRPS25	23.3301	22.7929	22.6966	23.2172	23.433	23.3977		-0.409452	+
28S ribosomal protein S26, mitochondrial	MRPS26	21.7461	21.7362	21.5004	22.0796	22.0518	21.9741		-0.374247	+
28S ribosomal protein S28, mitochondrial	MRPS28	24.3191	20.7187	23.7733	24.4054	24.7294	24.4758		-1.5998	+
28S ribosomal protein S31, mitochondrial	MRPS31	23.1492	23.0439	22.8647	23.4243	23.6322	23.3541	+	-0.450961	+
28S ribosomal protein S35, mitochondrial	MRPS35	24.9406	24.3135	24.4022	24.689	25.1979	24.4752		-0.235285	+
28S ribosomal protein S7, mitochondrial	MRPS7	23.4395	23.2177	23.2222	23.7495	23.8848	23.5647		-0.439891	+
mRNA turnover protein 4 homolog	MRTO4	24.9485	24.9996	24.7854	24.5512	24.6648	24.5901		0.309145
Myosin regulatory light chain 12A;Myosin regulatory light chain 12B;Myosin regulatory light polypeptide 9	MYL12A;MYL12B;MYL9	23.4486	23.2713	23.7017	20.1713	23.1312	20.569	+	2.18334	+
Myosin light polypeptide 6	MYL6	23.5253	23.8567	23.9654	21.0878	24.2083	23.7702		0.760368	+
Nuclear cap-binding protein subunit 2	NCBP2	22.8835	22.9475	22.7662	23.1678	23.1046	23.1619		-0.279036	+
Neurofilament medium polypeptide	NEFM	21.5899	21.6621	22.0404	20.6614	22.2037	20.9858		0.480502
60S ribosome subunit biogenesis protein NIP7 homolog	NIP7	21.6212	21.8168	21.3512	21.5838	21.4435	21.5009		0.086963
Nucleoside diphosphate kinase A;Putative nucleoside diphosphate kinase;Nucleoside diphosphate kinase B	NME1;NME2P1;NME2	20.2805	20.6354	21.5316	21.7399	21.8949	21.7992	+	-0.995544
Nucleolar and coiled-body phosphoprotein 1	NOLC1	24.0981	24.5702	23.9305	23.3307	22.5555	23.2482	+	1.15479
H/ACA ribonucleoprotein complex subunit 3	NOP10	21.954	22.038	22.1341	22.1233	21.8121	21.9818		0.0696208	+
Nucleolar protein 16	NOP16	22.4333	22.6418	22.2107	22.4621	22.4079	22.437		-0.0070343	+
Probable 28S rRNA (cytosine(4447)-C(5))-methyltransferase	NOP2	20.1853	20.7394	20.8614	19.789	19.9089	20.3438		0.581488	+
Nucleophosmin	NPM1	27.3831	27.2867	27.4742	27.0757	27.3403	27.2174		0.170212	+
5-methylcytosine rRNA methyltransferase NSUN4	NSUN4	21.8091	21.866	21.8283	22.414	22.2992	22.1663	+	-0.458708
Nuclear fragile X mental retardation-interacting protein 2	NUFIP2	19.9144	20.4428	21.1101	21.743	21.2732	21.285		-0.944674
Nuclear pore complex protein Nup153	NUP153	32.9398	31.7471	31.9596	31.7932	31.5623	31.7294		0.520559	+
Nucleoporin Nup37	NUP37	23.1502	22.5078	22.7726	23.0656	22.8658	22.9611		-0.153963
Nucleoporin Nup43	NUP43	22.2626	21.5459	22.0789	21.9871	22.0965	20.2767		0.509029
Nuclear pore complex protein Nup50	NUP50	23.6959	23.6787	23.4859	23.8649	23.9449	23.937		-0.295363
Nucleolar and spindle-associated protein 1	NUSAP1	21.7017	21.9423	21.5059	21.6603	21.8575	22.106		-0.157967
Nuclear RNA export factor 1	NXF1	25.8873	25.7736	25.7306	25.7875	25.8193	25.7689		0.00529035
NTF2-related export protein 1	NXT1	19.7386	26.6551	26.5027	26.5232	26.4162	26.2933		-2.11208
NTF2-related export protein 2	NXT2	24.8658	24.8325	24.679	25.0956	24.9054	24.9456		-0.189753
Polyadenylate-binding protein 4	PABPC4	24.1637	23.9742	24.1215	24.4544	24.4576	24.4868	+	-0.379845
Polyadenylate-binding protein 2	PABPN1	23.4639	23.6271	23.6591	24.1188	23.8084	24.0388		-0.405303	+
Poly [ADP-ribose] polymerase 1	PARP1	20.5367	20.8246	20.9351	21.5625	21.9916	21.5582	+	-0.938649	+
Poly(rC)-binding protein 2;Poly(rC)-binding protein 3	PCBP2;PCBP3	22.4243	22.4465	22.5183	22.9446	22.6555	22.8594		-0.35677
Serine/threonine-protein phosphatase PGAM5, mitochondrial	PGAM5	22.3014	23.4692	22.9342	23.879	23.7119	23.6841		-0.856696
PHD finger-like domain-containing protein 5A	PHF5A	23.3454	23.6174	19.7388	23.3462	23.564	23.5012		-1.23657
PHD finger protein 6	PHF6	21.6084	20.4025	21.621	22.2371	22.3487	21.8365		-0.930169	+
Pleiotropic regulator 1	PLRG1	21.561	20.3674	21.7563	21.3736	21.8953	21.7799		-0.454698
Pinin	PNN	22.4472	22.2295	20.6861	21.7702	21.8623	22.023		-0.0976137
RNA-binding protein PNO1	PNO1	21.1396	21.4887	19.8043	21.8415	21.9634	21.5868		-0.986337
Polymerase delta-interacting protein 3	POLDIP3	22.7482	22.4309	22.72	23.1269	22.9238	22.974		-0.375193	+
DNA-directed RNA polymerases I, II, and III subunit RPABC1	POLR2E	21.3606	21.4756	21.075	21.4746	21.3721	21.2529		-0.0628325
Peptidyl-prolyl cis-trans isomerase H	PPIH	21.8966	21.5306	21.8043	20.403	19.7846	21.8674		1.0588
Serine/threonine-protein phosphatase PP1-gamma catalytic subunit;Serine/threonine-protein phosphatase PP1-beta catalytic subunit	PPP1CC;PPP1CB	22.8551	22.715	22.6805	22.761	22.5883	22.3036		0.199209	+
Serine/threonine-protein phosphatase 2A 65 kDa regulatory subunit A alpha isoform	PPP2R1A	23.5735	22.3069	23.513	22.2509	22.8962	22.3809		0.621794	+
Serine/threonine-protein phosphatase 2A 55 kDa regulatory subunit B alpha isoform	PPP2R2A	22.5123	21.2079	21.6095	21.1562	20.6359	19.8153		1.24074
Peroxiredoxin-1	PRDX1	22.41	21.7817	22.1397	21.8001	21.6301	21.626		0.425081
Interferon-inducible double-stranded RNA-dependent protein kinase activator A	PRKRA	22.8857	23.2219	23.1226	23.2656	23.2484	23.1848		-0.156192	+
Pre-mRNA-processing factor 19	PRPF19	20.9408	20.1917	21.7418	21.327	21.687	21.6155		-0.585073
Polypyrimidine tract-binding protein 1	PTBP1	25.992	25.9078	26.0067	26.7862	26.1013	26.4913		-0.490746	+
Periodic tryptophan protein 1 homolog	PWP1	21.8899	21.5229	21.7282	21.3495	21.5358	21.0058		0.416612	+
Pyrroline-5-carboxylate reductase 1, mitochondrial	PYCR1	23.2382	22.7007	23.0676	23.5331	23.5187	23.7926	+	-0.612665
Pyrroline-5-carboxylate reductase 2	PYCR2	25.2238	24.6871	25.1012	25.6727	25.6899	25.7509	+	-0.70049
Pyrroline-5-carboxylate reductase 3	PYCRL	21.6387	21.1879	21.6833	21.6409	20.5766	21.4603		0.27733
mRNA export factor	RAE1	22.8865	23.0044	22.8937	23.6074	23.0439	23.2968		-0.387867	+
RNA-binding protein Raly	RALY	24.4238	24.4482	24.4152	24.5616	24.6802	24.7356		-0.230097	+
Histone-binding protein RBBP4	RBBP4	22.8881	22.5116	22.6809	22.8086	22.7675	22.4453		0.0197455	+
RNA-binding protein 14	RBM14	23.8217	24.0958	23.8873	24.4311	24.0456	24.5549		-0.408915	+
RNA-binding protein 3	RBM3	22.6251	22.9043	22.6111	23.4065	23.4762	19.7261		0.510554
RNA-binding protein 34	RBM34	22.3742	22.4065	22.2491	22.1783	21.8416	19.8216		1.06271
RNA-binding motif protein, X chromosome;RNA-binding motif protein, X chromosome, N-terminally processed	RBMX	27.7166	27.7469	27.6267	27.6721	27.6626	27.6464		0.0363566	+
RNA-binding protein with serine-rich domain 1	RNPS1	22.3547	22.3504	22.2534	22.4058	22.2408	22.2598		0.0173601	+
60S ribosomal protein L10	RPL10	23.4149	23.6858	23.2152	23.5761	23.7667	23.7432		-0.256706	+
60S ribosomal protein L13a;Putative 60S ribosomal protein L13a protein RPL13AP3	RPL13A;RPL13AP3	26.7418	26.5551	26.4887	26.4375	26.6202	26.4588		0.0897357	+
60S ribosomal protein L17	RPL17	26.0994	26.2334	26.0381	26.0323	26.278	26.0839		-0.00777117	+
60S ribosomal protein L18	RPL18	23.9996	24.7349	23.7581	23.8153	24.2299	24.2237		0.0745894	+
60S ribosomal protein L18a	RPL18A	26.0853	26.4581	25.9832	25.995	26.0544	26.078		0.133101	+
60S ribosomal protein L19	RPL19	25.167	25.1784	25.1218	25.0202	25.2487	20.0629		1.71176	+
60S ribosomal protein L21	RPL21	27.9115	28.2836	27.7984	27.8218	27.9963	27.9641		0.0704365	+
60S ribosomal protein L22	RPL22	28.5189	28.432	28.2389	28.681	28.3791	28.4406		-0.103656	+
60S ribosomal protein L23	RPL23	26.0119	26.086	25.8834	26.1717	26.3182	26.0933		-0.20066	+
60S ribosomal protein L24	RPL24	26.7538	27.0153	26.4707	26.6299	26.8495	26.7882		-0.00926272	+
60S ribosomal protein L27a	RPL27A	26.2944	26.897	26.2734	26.4317	26.6192	26.1534		0.0867945	+
60S ribosomal protein L29	RPL29	28.3636	29.1669	28.5352	28.3104	28.5324	28.7163		0.168867	+
60S ribosomal protein L3	RPL3	26.4456	27.104	26.3433	26.0578	26.5969	26.4326		0.268532	+
60S ribosomal protein L32	RPL32	26.9952	27.1511	26.9183	27.0793	26.9968	26.8932		0.0317853	+
60S ribosomal protein L34	RPL34	27.5787	27.8002	27.5489	27.4921	27.6936	27.4839		0.0860761	+
60S ribosomal protein L35	RPL35	28.8789	29.0418	28.4329	28.707	29.2507	29.363		-0.322348	+
60S ribosomal protein L35a	RPL35A	26.0212	25.933	25.873	25.559	26.1947	25.6732		0.133433	+
60S ribosomal protein L36	RPL36	27.5881	27.7132	27.5307	27.3153	27.6629	27.6339		0.0732937	+
60S ribosomal protein L36a-like;60S ribosomal protein L36a	RPL36AL;RPL36A	25.8198	26.38	25.7299	26.018	26.2372	26.195		-0.173546	+
60S ribosomal protein L37a	RPL37A	26.3073	26.537	25.9952	25.9959	26.0821	26.0993		0.220714
60S ribosomal protein L4	RPL4	23.3865	24.3434	23.2931	23.4048	23.788	23.8474		-0.00572586
60S ribosomal protein L5	RPL5	23.9589	24.1694	24.1392	23.9754	23.471	23.8837		0.312478	+
60S ribosomal protein L7	RPL7	25.3439	25.3303	24.748	24.4482	24.8041	24.7147		0.485062	+
60S ribosomal protein L8	RPL8	26.683	26.9071	26.4464	26.6077	26.6819	26.6391		0.0359459	+
60S ribosomal protein L9	RPL9	26.1356	26.5478	26.4574	26.4224	26.5555	26.3583		-0.0651296	+
60S acidic ribosomal protein P1	RPLP1	28.6959	28.2845	28.6579	29.5057	28.8221	28.3234		-0.337642	+
40S ribosomal protein S10	RPS10	28.6213	29.0402	28.5788	28.5192	28.6567	28.664		0.133464	+
40S ribosomal protein S12	RPS12	26.6274	26.8734	26.6768	26.1949	25.7913	25.8873	+	0.768031	+
40S ribosomal protein S13	RPS13	30.0724	29.8563	29.8342	29.8898	30.0951	29.9427		-0.0549164	+
40S ribosomal protein S15	RPS15	29.2304	29.0948	29.1051	29.1753	29.0982	29.0451		0.037241	+
40S ribosomal protein S15a	RPS15A	26.0724	26.0479	25.9427	25.9184	25.9705	25.8946		0.0931822	+
40S ribosomal protein S17	RPS17	28.448	28.4469	28.2353	28.6355	28.6208	28.498		-0.208064	+
40S ribosomal protein S23	RPS23	26.0232	26.3041	25.8886	25.9703	26.229	25.9336		0.0276814	+
40S ribosomal protein S24	RPS24	27.9538	27.7989	27.8083	27.6205	27.7737	27.9167		0.0833422	+
40S ribosomal protein S25	RPS25	28.2528	28.3226	28.1291	28.1581	28.3074	28.1932		0.0152486	+
40S ribosomal protein S27;40S ribosomal protein S27-like	RPS27;RPS27L	23.2943	23.9214	22.9364	23.4717	23.6219	23.5117		-0.15106	+
Ubiquitin-40S ribosomal protein S27a;Ubiquitin;40S ribosomal protein S27a	RPS27A	26.4776	26.6937	26.2223	26.3294	26.191	26.4496		0.141203
40S ribosomal protein S28	RPS28	25.9713	26.1698	26.1446	25.5622	25.8033	26.0439		0.292096	+
40S ribosomal protein S29	RPS29	25.366	25.35	25.5638	25.3689	25.2902	25.2667		0.118017	+
40S ribosomal protein S5;40S ribosomal protein S5, N-terminally processed	RPS5	26.5723	26.8321	26.5878	26.508	26.8437	26.8772		-0.0789477	+
40S ribosomal protein S7	RPS7	28.724	28.396	28.4274	28.7457	28.6392	28.4723		-0.103245	+
40S ribosomal protein S9	RPS9	24.2025	24.6691	24.0562	24.2891	24.5824	24.5476		-0.163762	+
Ribosomal L1 domain-containing protein 1	RSL1D1	21.8287	22.2362	22.0053	21.8126	21.9201	21.9264		0.136992	+
tRNA-splicing ligase RtcB homolog	RTCB	24.9645	24.7442	24.8524	25.4055	25.3329	25.403	+	-0.526777	+
RuvB-like 1	RUVBL1	23.453	22.8998	23.3588	23.2066	23.2506	23.1058		0.0495129
RuvB-like 2	RUVBL2	22.5415	22.3326	22.3896	22.1653	22.244	22.061		0.264439
Histone deacetylase complex subunit SAP18	SAP18	22.4373	20.2543	22.982	22.4298	22.7646	22.5046		-0.675114	+
Plasminogen activator inhibitor 1 RNA-binding protein	SERBP1	25.4847	25.8449	25.4422	25.3395	25.4677	25.5015		0.154361
Splicing factor 3B subunit 2	SF3B2	24.2767	24.3255	24.2213	24.2274	24.4196	24.2968		-0.0401236	+
Splicing factor 3B subunit 3	SF3B3	22.2797	21.6928	22.1847	22.0108	21.9159	21.7439		0.162178	+
Splicing factor 3B subunit 4	SF3B4	25.7759	25.6468	25.5647	25.7829	25.1296	25.4879		0.19564
Splicing factor 3B subunit 5	SF3B5	23.3782	23.2822	23.0343	23.2148	22.5898	22.8159		0.358093	+
Splicing factor 3B subunit 6	SF3B6	22.316	22.445	22.1189	22.3389	21.8764	21.8803		0.261383
Splicing factor, proline- and glutamine-rich	SFPQ	25.0092	25.726	25.26	26.2039	26.0206	26.6323	+	-0.953876	+
U5 small nuclear ribonucleoprotein 40 kDa protein	SNRNP40	23.474	23.5138	23.3361	23.6148	23.636	23.5581		-0.16172
U1 small nuclear ribonucleoprotein A	SNRPA	23.7694	23.7067	23.6993	23.9159	24.0245	23.5223		-0.0957489	+
U2 small nuclear ribonucleoprotein A	SNRPA1	24.0362	24.1037	24.0283	23.9093	24.0823	24.0664		0.0367565	+
U2 small nuclear ribonucleoprotein B	SNRPB2	21.0301	23.6339	20.806	24.3406	23.5419	23.8919		-2.1015
Small nuclear ribonucleoprotein Sm D1	SNRPD1	25.4373	25.7399	25.7355	26.0976	25.1176	25.4299		0.0891991	+
Small nuclear ribonucleoprotein Sm D2	SNRPD2	24.9026	25.1142	24.7486	24.9873	25.2125	25.0336		-0.155971	+
Small nuclear ribonucleoprotein Sm D3	SNRPD3	26.6524	27.0204	26.5839	27.0849	27.0338	26.8341		-0.232028
Small nuclear ribonucleoprotein-associated protein N;Small nuclear ribonucleoprotein-associated proteins B and B	SNRPN;SNRPB	24.3621	24.8787	24.7395	24.8123	25.0308	24.7969		-0.219916
SNW domain-containing protein 1	SNW1	23.0717	23.2864	22.9262	23.2743	23.4193	23.261		-0.223406
Signal recognition particle 14 kDa protein	SRP14	27.1405	26.8876	26.992	27.069	27.2567	26.8918		-0.0657673
Signal recognition particle 9 kDa protein	SRP9	24.2421	24.3202	19.611	24.3967	24.4329	24.2159		-1.62412
Serine/arginine repetitive matrix protein 1	SRRM1	22.7953	22.9501	22.4265	22.7621	22.6044	23.0765		-0.0903695
Serine/arginine-rich splicing factor 1	SRSF1	26.5922	26.6915	26.636	26.9235	26.9273	26.9063	+	-0.279132	+
Serine/arginine-rich splicing factor 2;Serine/arginine-rich splicing factor 8	SRSF2;SRSF8	23.7195	23.9178	23.4892	24.4056	24.2985	24.216	+	-0.597844	+
Serine/arginine-rich splicing factor 3	SRSF3	26.2245	26.3364	26.1097	26.6037	26.4649	26.3823		-0.260132	+
Serine/arginine-rich splicing factor 5	SRSF5	23.2066	22.9881	23.214	23.7665	22.961	23.7635		-0.360769
Serine/arginine-rich splicing factor 7	SRSF7	24.6475	24.3828	24.4105	25.0026	24.5568	24.572		-0.230188
Lupus La protein	SSB	23.8509	23.9917	23.7435	23.5743	23.9186	23.7192		0.124655	+
Double-stranded RNA-binding protein Staufen homolog 1	STAU1	25.0004	24.8831	24.8699	25.3039	25.0949	25.0008		-0.215404
Serine-threonine kinase receptor-associated protein	STRAP	21.8103	22.1542	21.9872	22.0391	22.0921	22.027		-0.0688356	+
Activated RNA polymerase II transcriptional coactivator p15	SUB1	24.2363	24.5039	24.1378	24.7308	24.5429	23.9833		-0.12633	+
Heterogeneous nuclear ribonucleoprotein Q	SYNCRIP	23.3897	23.239	23.2626	23.1333	23.1996	23.242		0.10544	+
Transcription factor A, mitochondrial	TFAM	23.6325	23.5784	23.5144	23.9946	24.0341	23.8512	+	-0.384912	+
Thyroid hormone receptor-associated protein 3	THRAP3	24.1861	24.2337	24.2438	24.358	24.202	24.4621		-0.11948	+
Cytochrome b-c1 complex subunit 6, mitochondrial	UQCRH	20.5145	22.4865	20.704	22.7316	23.0362	22.7446	+	-1.6025
WD repeat-containing protein 5	WDR5	22.6924	22.4715	22.2356	22.493	22.2983	22.6626		-0.0181662
WD repeat-containing protein 82	WDR82	21.9613	21.3419	19.2159	22.0878	22.3885	21.9173		-1.29147	+
Partner of Y14 and mago	WIBG	21.9043	21.5691	21.6321	21.7873	22.3329	22.0002		-0.338295
Pre-mRNA-splicing regulator WTAP	WTAP	21.1826	19.4561	20.915	20.8005	20.9469	21.0727		-0.422126
X-ray repair cross-complementing protein 6	XRCC6	22.2898	21.6437	22.1008	22.5462	22.8288	22.35		-0.563527
Y-box-binding protein 3	YBX3	26.8094	26.8567	26.7243	26.8276	27.0956	27.1608		-0.231158	+
Zinc finger CCHC domain-containing protein 3	ZCCHC3	21.6279	21.1567	21.429	22.0266	21.6214	21.8767		-0.437049	+
BUB3-interacting and GLEBS motif-containing protein ZNF207	ZNF207	20.4065	20.6454	20.2949	20.9609	21.2264	20.9141	+	-0.58486
Zinc finger protein 787	ZNF787	22.0119	21.9483	21.7476	22.0523	21.977	21.9291		-0.083587	+
		23.9208	24.0309	23.9771	24.0893	23.6598	24.2045		-0.00826581
